# Assessing DNA Barcoding as a Tool for Species Identification and Data Quality Control

Yong-Yi Shen<sup>1\*</sup>, Xiao Chen<sup>2,3</sup>, Robert W. Murphy<sup>3,4</sup>

**1** School of Life Sciences, Xiamen University, Xiamen, People's Republic of China, **2** Zhejiang Mariculture Research Institute, Wenzhou, People's Republic of China, **3** State Key Laboratory of Genetic Resources and Evolution, Kunming Institute of Zoology, the Chinese Academy of Sciences, Kunming, People's Republic of China, **4** Centre for Biodiversity and Conservation Biology, Royal Ontario Museum, Toronto, Canada

## Abstract

In recent years, the number of sequences of diverse species submitted to GenBank has grown explosively and not infrequently the data contain errors. This problem is extensively recognized but not for invalid or incorrectly identified species, sample mixed-up, and contamination. DNA barcoding is a powerful tool for identifying and confirming species and one very important application involves forensics. In this study, we use DNA barcoding to detect erroneous sequences in GenBank by evaluating deep intraspecific and shallow interspecific divergences to discover possible taxonomic problems and other sources of error. We use the mitochondrial DNA gene encoding cytochrome *b* (*Cytb*) from turtles to test the utility of barcoding for pinpointing potential errors. This gene is widely used in phylogenetic studies of the speciose group. Intraspecific variation is usually less than 2.0% and in most cases it is less than 1.0%. In comparison, most species differ by more than 10.0% in our dataset. Overlapping intra- and interspecific percentages of variation mainly involve problematic identifications of species and outdated taxonomies. Further, we detect identical problems in *Cytb* from Insectivora and Chiroptera. Upon applying this strategy to 47,524 mammalian *CoxI* sequences, we resolve a suite of potentially problematic sequences. Our study reveals that erroneous sequences are not rare in GenBank and that the DNA barcoding can serve to confirm sequencing accuracy and discover problems such as misidentified species, inaccurate taxonomies, contamination, and potential errors in sequencing.

**Citation:** Shen Y-Y, Chen X, Murphy RW (2013) Assessing DNA Barcoding as a Tool for Species Identification and Data Quality Control. PLoS ONE 8(2): e57125. doi:10.1371/journal.pone.0057125

**Editor:** Dirk Steinke, Biodiversity Institute of Ontario - University of Guelph, Canada

**Received:** July 6, 2012; **Accepted:** January 17, 2013; **Published:** February 19, 2013

**Copyright:** © 2013 Shen et al. This is an open-access article distributed under the terms of the Creative Commons Attribution License, which permits unrestricted use, distribution, and reproduction in any medium, provided the original author and source are credited.

**Funding:** The authors thank National Natural Science Foundation of China (31172080), Key Program of West Light Foundation (2011), Youth Innovation Promotion Association of the Chinese Academy of Sciences, and Engineering Research Council (Discovery Grant 3148) for their support. The funders had no role in study design, data collection and analysis, decision to publish, or preparation of the manuscript.

**Competing Interests:** The authors have declared that no competing interests exist.

\* E-mail: shen\_yongyi@yahoo.com.cn

† These authors contributed equally to this work.

## Introduction

Publically available, GenBank (<http://www.ncbi.nlm.nih.gov/sites/entrez>) provides an annotated suite of open access, nucleotide sequences and, when applicable, their amino acid translations. GenBank relies on direct submissions from individual laboratories. Because of increasing efficiencies of sequencing and molecular research, the volume of data is explosively increasing. The sheer volume of new information necessarily translates into the accumulation of errors. For example, more than half of all published human mtDNA studies have errors [1] and 5.0% error in mitochondrial 16S rRNA sequence data occurs in public repositories [2]. Although attention focuses on the quality of the human mtDNA database [3–5], little effort focuses on the extent of erroneous sequences arising from the misidentification of species, sampling error, and contamination, especially in phylogenetic analyses. Unfortunately, the 'garbage in, garbage out' rule applies. If the data are not reliable, forensic analyses will have limited repeatability, phylogenies will introduce confusion, and in both cases errors may even lead to irreproducible results.

DNA barcoding usually consists of a fragment of the mitochondrial gene cytochrome oxidase c subunit I (*CoxI*, *mt-coI*, *COI*) but other genes are also employed, sometimes with

varying levels of success [6,7]. The method has many applications among which it is an efficient means of identifying species because levels of divergence among individuals are usually much lower of the same species than between closely related species [8–14]. Barcoding successfully identifies a great diversity of species [15–27]. A sequence from a misidentified species will result in a high level of intraspecific K2P divergence [28]. In this study, we use divergence values to detect potential errors in sequences in GenBank to assess and improve the quality of the data.

Phylogenetic/genealogical analyses commonly use cytochrome *b* (*Cytb*) sequences. Thus, we use a dataset of 2555 *Cytb* sequences of turtles to test the power of DNA barcoding to confirm species identities and pinpoint problems. If this approach proves to be a powerful means of identifying errors, we can expect it to detect potential flaws in other groups. Thus, we further analyze 3516 and 6269 *Cytb* sequences in the Insectivora and Chiroptera. *CoxI* is the most widely used marker for DNA barcoding and, therefore, we also analyze 47,524 mammalian *CoxI* sequences in GenBank.

## Results and Discussion

The compiled dataset of *Cytb* sequences from turtles was used to evaluate the ability of DNA barcoding to detect erroneous

sequences in GenBank. The lengths of available *Cytb* sequences vary, and consequently a clear tradeoff exists between maximizing the length of the alignments and taxonomic coverage. The final data set consists of 1686 fragments of 924bp. When we set *Cytb* GenBank accession NC\_015986 as the standard for all comparisons, the available fragments ranged from 75bp to 998bp. Given that the goal is to identify erroneous species and data, we use neighbor joining (NJ) trees as an efficient means of summarizing divergence between the sequences. Not surprising, the topology of the NJ phenogram is almost identical to trees obtained using morphology [29], nuclear genes [30–32], and mitochondrial genes [31], although the bootstrap values are smaller, as expected, and some branching orders remain unsolved (Figure S1). Nucleotide diversity averages 16.0% and transitions are saturated at about 15.0% when all codon positions are compared (Figure 1).

To identify species, we assume that the intraspecific differences are much less than interspecific divergences. Intraspecific divergences rarely exceed 5.0% and most are less than 1.0% in this dataset. In contrast, interspecific divergences usually exceed 8.0% (Figure 2). However, some notable exceptions to the pattern occur. *Ocadia glyphistoma* (AY434596) hardly differs from *Mauremys annamensis* (0.5–4.9%), and *M. pritchardi* is very similar to *M. mutica* (0.0%–6.4%). These divergence values are substantially lower than most interspecific values. This finding conforms to previous studies [33,34]. The K2P divergence between *Mauremys megaloccephala* and *M. reevesi* is 0.0–1.0% and such low values imply conspecificity. *Cuora trifasciata* (AY434627) has a very close relationship with *Cuora aurocapitata* (0.3%–2.5%) and *Cuora pani* (0.3–1.9%). Thus, *Cuora aurocapitata*, *Curora pani*, and *Curora zhoui* appear to have recent origins [33–37]. Similarly, the intraspecific divergences for *Pseudemys nelsoni* (0.0%), *Pseudemys rubriventris* (0.2–0.5%), *Pseudemys suwanniensis* (0.1%), *Pseudemys peninsularis* (0.0–0.4%), *Pseudemys texana* (0.1%), *Pseudemys gorzugi* (0.0%), *Pseudemys alabamensis* (0.0–0.5%), *Pseudemys concinna* (0.0–0.7%) overlap with their interspecific divergences (0.0–1.1%). In genus *Graptemys*, the intraspecific divergence is 0.0–0.3%, while the interspecific divergence in this

genus is 0.0–2.8%. These results suggest that the species in these two genera may have recent origins.

*Ocadia philippeni* and *Mauremys iversoni* show relatively low divergence (0.3–0.5%). Other confusion exists. One sequence of *Pangshura smithii* (AM495294) clusters with *Pangshura tentoria* (0.0–0.7%). Further, one sequence of *Pangshura tentoria* (AM495328) clusters with *Pangshura smithii* (0.0–0.2%).

*Cyclemys tcheponeensis* (AY434577), *Cyclemys shanensis* (AJ604513), and *Cyclemys dentate* (AY434579) show shallow interspecific divergence from *Cyclemys oldhamii* (0.0–1.7%). This unexpected finding implies either that these “species” are, in fact, conspecific or the source specimens are not correctly identified. The same problem occurs for several pairs of taxa. *Pelusios chapini* (FR716922) is similar to *Pelusios castaneus* (1.3–1.9%). *Phrynops geoffroanus* (JX139069) and *Mesoclemmys gibba* (JX139068) have the same sequence. Two sequences of *Cuora picturata* (NC\_017878 and JF712890) are the same as those of *Cuora bourreti* (NC\_017885 and JN020145). *Sternotherus odoratus* (GQ896189) is identical to sequences of *Sternotherus carinatus*. *Cyclemys atripons* (NC\_010970 and AY434617) has shallow interspecific divergence (0.0–0.9%) from *Cyclemys pulchriata*. In these cases, the lack of difference between the species indicates the need for further study. Either corrections are required in GenBank or the taxonomy of the taxa needs reexamination.

Deep intraspecific divergence also occurs in the database. For example, *Cuora flavomarginata* has two divergent clusters (EU708434 and NC\_012054 vs. AY434570, GQ896188, and AY434606) that differ by 6.5–7.4%. Two sequences of *Deirochelys reticularia* (FJ770592–93 vs. HE590299) differ by 19.0%. *Orlitia borneensis* (AY434619 vs. AJ564464) differ by 12.4%. One sequence of *Palea steindachneri* (AY743417) deeply diverges from other sequences (AY259552 and NC\_013841) (15.4–16.0%). *Pelochelys cantorii* (JF719809) has intraspecific divergence of 19.1–19.2%. These cases also suggest either misidentifications or problematic taxonomies.

The problematic sequence for *Palea steindachneri* (AY743417) is quite similar to that of *Pelochelys cantorii* (JF719809; 1.6%). *Sacalia*

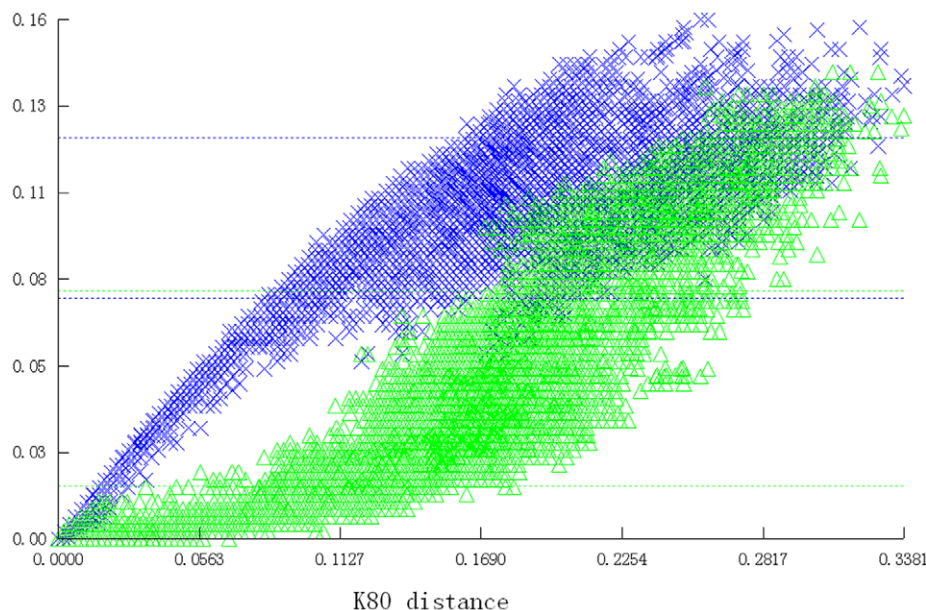

**Figure 1. Transitions and transversions plotted against the pairwise sequence divergence for turtles using 924bp of the *Cytb* DNA barcode.** All three codon positions are used.  
doi:10.1371/journal.pone.0057125.g001

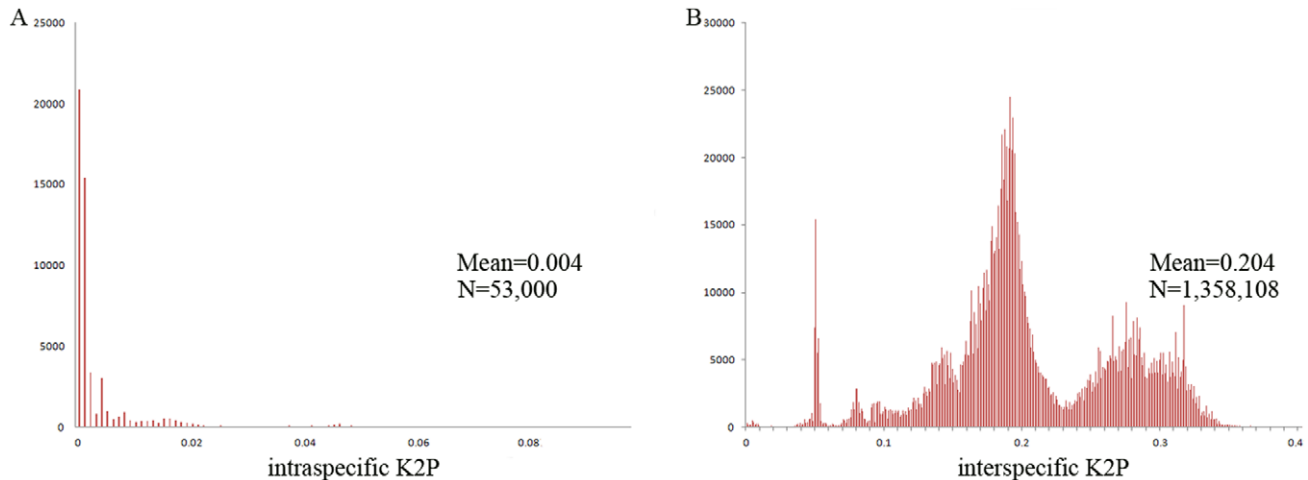

**Figure 2. Intra- (A) and interspecific (B) pairwise divergences (Kimura 2-parameter).** Majority of intraspecific divergences are less than 5.0% (A); majority of interspecific divergences exceed 8.0% (B). doi:10.1371/journal.pone.0057125.g002

*quadricellata* (NC\_011819) shows shallow interspecific divergence with *Sacalia bealei* (0.2–1.1%) yet deep intraspecific variation 9.3–10.0%. Thus, the specimens for sequences AY743417 and NC\_011819 may be misidentified. Such contradictory values document that to err is human, and yet DNA barcoding can detect such errors.

No particular level of divergence can serve to identify species. Rather, such data can point to taxa that need additional study. K2P distances between *Rhinoclemmys diademata*, *R. punctularia*, and *R. melanostema* range from 1.4% to 2.3%. The low levels of divergence indicate either recent divergences or perhaps a taxon-specific slowing of the molecular clock. More importantly, only one sequence is available for each species and the result indicates a need for further study using more samples. Similarly, newly described *Emys trinacris* [38] forms an independent lineage that is the sister group of *E. orbicularis*. However, interspecific divergences are very low (0.7–2.3%) and intraspecific divergences of *E. orbicularis* range from 0.0 to 2.0%.

Many currently recognized taxonomic names are composites of cryptic species complexes [39]. *Testudo graeca* (six subspecies) and *Geochelone pardalis* (two subspecies) have complex relationships. Intraspecific divergence in the former species ranges from 0.0 to 8.1% and in the latter from 0.0 to 12.4%. Thus, these two species complexes require further attention as they may be polytypic. DNA barcoding has accelerated the rates of taxonomic discovery and descriptions to meet or exceed rates of biodiversity loss [40–42]. In contrast to great variation, 16 samples of *Indotestudo forstenii* share one haplotype. This endangered species has a critically low level of diversity necessitating that greater attention must be paid to its conservation status.

Overlapping intra- and interspecific levels of divergences indicate not only natural variation but also potential errors in GenBank and taxonomic conundrums. Among the several new species of turtles described during the last 20 years based on morphology, most were controversial. Our study affirms that DNA barcodes can provide critical data before the description of a new species, and this may involve forensics into geographic origins [43].

To test if our barcoding strategy is applicable to other taxa, we analyzed two orders of mammals, shrews (Insectivora) and bats (Chiroptera). Both groups contain a large number of species and species identity can be confusing. Identical to turtles, analyses

detect potential errors in GenBank sequences, as well as taxonomic uncertainties (Table 1).

*CoxI* is the most widely used marker for DNA barcoding. Therefore, we also analyze 47,524 mammalian *CoxI* sequences in GenBank. Not surprising, many potential errors occur (Table S1). This result suggests that the paradox of deep intraspecific and shallow interspecific K2P distances can detect potential errors. This paradox is likely to be useful for a variety of popular genes such as 12S and 16S. If we exclude human sequences, primates have the highest error ratio (2.12%). When we do not exclude human sequences, even-toed ungulates have the highest error ratio (1.68%), as Table S2 shows.

In view of an explosive amount of data deposited in GenBank from an increasing number of laboratories, our study shows that erroneous sequences are not rare. In addition to artificial technological errors in sequencing, sample mix-up, contamination, and incorrect species identification constitute other possible sources of error. Erroneous data may strongly impact critical forensic applications, and result in confused taxonomies and phylogenies. Such errors are often hard to detect, and all too frequently there is no confirmation of either taxonomic accuracy or the possibility of contamination. The paradox of deep intraspecific and shallow K2P interspecific differences suggest that further verification of accuracy is necessary. Certainly, not all paradoxes owe to contamination and inaccurate identifications of species. Problematic and outdated taxonomies are also involved. Once reliable data are available for each species, and especially from type localities, it is possible to easily determine the source of the problematic sequences, be that sequencing errors or invalid taxonomies. The global initiative to DNA barcode all species of amphibians and reptiles – Cold Code [44] -- seeks to suggest corrections to GenBank. Thus, DNA barcoding is not only valuable for identifying species, but it can play an important role in detecting potential errors in GenBank.

## Materials and Methods

### 3.1 Source of data

We used the query “((cytb[*gene*] or "cytochrome b"[*gene*]) AND "vertebrates"[*porgn*:\_\_txid7742]) AND "turtles"[*porgn*:\_\_txid8459] AND 100:20000[SLEN]” to search for *Cytb* sequences of turtles in NCBI. Similarly, we used the query “(((cytb[*gene*] or

**Table 1.** Potential errors for *cytb* sequences in Insectivora and Chiroptera.

| Potential error sequences                                                                                                                                                                                                     | reasons                                                                                                                      |
|-------------------------------------------------------------------------------------------------------------------------------------------------------------------------------------------------------------------------------|------------------------------------------------------------------------------------------------------------------------------|
| DQ869420 <i>Artibeus planirostris</i> ; DQ869421 <i>Artibeus planirostris</i> ;<br>DQ869419 <i>Artibeus planirostris</i>                                                                                                      | Shallow interspecific divergence with <i>Artibeus jamaicensis</i> (0.1%–5.0%) but deep intraspecific divergence (6.0%–7.9%)  |
| U66502; AY144339; AY144338 <i>Artibeus intermedius</i>                                                                                                                                                                        | Shallow divergence with <i>Artibeus lituratus</i> (1.1%–3.8%)                                                                |
| AY572353 <i>Artibeus jamaicensis</i> ; AY572355 <i>Artibeus jamaicensis</i>                                                                                                                                                   | Shallow interspecific divergence with <i>Artibeus schwartzi</i> (0.4%–1.3%) but deep intraspecific divergence (4.2%–6.9%)    |
| DQ985486 <i>Artibeus jamaicensis</i> ; U66504 <i>Artibeus jamaicensis</i> ;<br>U66503 <i>Artibeus jamaicensis</i>                                                                                                             | Shallow interspecific divergence with <i>Artibeus planirostris</i> (0.3%–4.5%) but deep intraspecific divergence (4.9%–8.8%) |
| DQ869386; U66513; U66512; U66516 <i>Artibeus glaucus</i>                                                                                                                                                                      | Deep intraspecific divergence (7.4%–13.2%)                                                                                   |
| DQ077405 <i>Micronycteris minuta</i> ; AY380753 <i>Micronycteris schmidto</i>                                                                                                                                                 | Shallow interspecific divergence (0.4%)                                                                                      |
| AY380756 <i>Micronycteris microtis</i>                                                                                                                                                                                        | Shallow interspecific divergence with <i>Micronycteris megaloti</i> (0.4%–3.5%) but deep intraspecific divergence (5.8%)     |
| AB085735 <i>Miniopterus fuliginous</i>                                                                                                                                                                                        | Shallow divergence with <i>Miniopterus schreibers</i> (0.4%–1.4%)                                                            |
| EF570882 <i>Plecotus auritus</i>                                                                                                                                                                                              | Deep intraspecific divergence (11.7%)                                                                                        |
| EF517305 <i>Miniopterus magnater</i>                                                                                                                                                                                          | Shallow divergence with <i>Miniopterus schreibers</i> (1.0%–1.7%)                                                            |
| AB085738 <i>Vespertilio superans</i>                                                                                                                                                                                          | Shallow divergence with <i>Vespertilio sinensis</i> (0.7%–1.2%)                                                              |
| AB106605 <i>Myotis mystacinus</i>                                                                                                                                                                                             | Deep intraspecific divergence (20.3%–20.6%)                                                                                  |
| AY665142; AY665145; AY665161; AY665164 <i>Myotis aurascens</i>                                                                                                                                                                | Deep intraspecific divergence (8.6%–19.9%)                                                                                   |
| AY324470–AY324473 <i>Apomys insignis</i> ; AY324467–AY324469 <i>Apomys hylcoetes</i>                                                                                                                                          | Show shallow interspecific divergence (0.0–0.4%)                                                                             |
| AB077073 <i>Crocridura dsinezumi</i>                                                                                                                                                                                          | Shallow interspecific divergence with <i>Crocridura lasiura</i> (1.2%) but deep intraspecific divergence (7.1%–8.5%)         |
| AY994386 <i>Crocridura suaveolens</i>                                                                                                                                                                                         | Shallow interspecific divergence with <i>Crocridura sibirica</i> (0.2%–0.7%) but deep intraspecific divergence (8.5%)        |
| AY994373 <i>Crocridura gueldenstaed</i>                                                                                                                                                                                       | Shallow divergence with <i>Crocridura sibirica</i> (0.3%–0.6%)                                                               |
| AY926383 <i>Dipodomys merriami</i> ; AY926371 <i>Dipodomys insularis</i> ; AY926370<br><i>Dipodomys margaritae</i>                                                                                                            | Shallow interspecific divergence (1.0%–1.1%)                                                                                 |
| AB175092–AB175094 <i>Chimarrigale himalayic</i> ; AB107874–AB107875<br><i>Chimarrigale himalayic</i>                                                                                                                          | Deep intraspecific divergence (14.3%–14.8%)                                                                                  |
| AB175114–AB175115 <i>Episoriculus caudatus</i> ; AB175112–AB175113<br><i>Episoriculus caudatus</i>                                                                                                                            | Deep intraspecific divergence (13%–13.4%)                                                                                    |
| AY014927–AY014930, EU088307 <i>Sorex ugyunak</i> ; AY014916–AY014920<br><i>Sorex camtschatica</i> ; AY014931–AY014933 <i>Sorex hydrodromus</i> ;<br>AY014921 <i>Sorex portenkoi</i> ; AY014922–AY014926 <i>Sorex jacksoni</i> | Shallow interspecific divergence (0.0–0.8%)                                                                                  |
| AY014934–AY014935 <i>Sorex preblei</i> ; AY014938–AY014940 <i>Sorex haydeni</i>                                                                                                                                               | Shallow interspecific divergence (0.0–0.9%)                                                                                  |

doi:10.1371/journal.pone.0057125.t001

"cytochrome b"[gene]) AND "vertebrates"[porgn:\_\_txid7742]) AND 100:20000[SLEN]) AND "mammals"[porgn:\_\_txid40674]) AND "bats"[porgn:\_\_txid9397]" for bats, and "(((cytb[gene] or "cytochrome b"[gene]) AND "vertebrates"[porgn:\_\_txid7742]) AND 100:20000[SLEN]) AND "mammals"[porgn:\_\_txid40674]) AND "insectivores"[porgn:\_\_txid9362]" for insectivores. For *CoxI*, we queried "((CoxI[gene] or "cytochrome c oxidase subunit I"[gene] or CoxI[gene] or COI[gene]) AND "vertebrates"[porgn:\_\_txid7742]) AND "mammals"[porgn:\_\_txid40674]) AND 100:20000[SLEN]" to search for all mammalian *CoxI* sequences. In total, 2555 mitochondrial *Cytb* sequences of turtles, and 3516 and 6269 *Cytb* sequences of Insectivora and Chiroptera, respectively, were downloaded from GenBank. Additionally, 47,524 *CoxI* sequences for mammals were obtained from GenBank on 1 September 2012.

### 3.2 Data Analysis

The datasets for *Cytb* and *CoxI* were treated independently. All datasets were firstly aligned by MAFFT – a fast multiple sequence alignment program [45]. The alignments were trimmed by deleting the flanking regions of *Cytb* and *CoxI*. The trimmed

sequences were aligned again by Clustal ×1.8 [46] to obtain more accurate alignments. These alignments were examined by eye and when required adjusted to exclude obvious alignment errors. The length of these published sequences varied. To obtain the maximum amount of homologous sequences. Accordingly, we obtained a final dataset that sought the greatest taxonomic diversity while considering the longest sequences by deleting outliers. All the datasets were available upon request.

For each dataset, A neighbor-joining tree the distance was created to provide a graphic representation of the patterning of divergences among species [47]. Sequence divergences were estimated using the K2P distance model [28] in MEGA 4 [48]. Sequences that had deep intraspecific or shallow interspecific K2P divergences were recorded as being potential errors. Then, we further checked their nucleotide sequences and its phylogenetic position by eye.

Transition saturation was tested by plotting the estimated number of transitions and transversions against genetic divergence using DAMBE [49]. Third codon positions and the first two codon positions were tested separately and combined.

## Supporting Information

### Figure S1 Neighbor-joining tree using 924 bp *Cytb* sequences for turtles.

(TIF)

### Table S1 Potential error *CoxI* sequences in mammals. (DOC)

### Table S2 Potential error ratio for *CoxI* sequences in mammals. (DOCX)

## Author Contributions

Conceived and designed the experiments: YYS. Performed the experiments: XC YYS. Analyzed the data: XC YYS. Contributed reagents/materials/analysis tools: YYS. Wrote the paper: YYS RWM.

## References

- Forster P (2003) To err is human. *Ann Hum Genet* 67: 2–4.
- Ashelford KE, Chuzhanova NA, Fry JC, Jones AJ, Weightman AJ (2005) At least 1 in 20 16S rRNA sequence records currently held in public repositories is estimated to contain substantial anomalies. *Appl Environ Microbiol* 71: 7724–7736.
- Yao YG, Bravi CM, Bandelt HJ (2004) A call for mtDNA data quality control in forensic science. *Forensic Sci Int* 141: 1–6.
- Pompanon F, Bonin A, Bellemin E, Taberlet P (2005) Genotyping errors: causes, consequences and solutions. *Nat Rev Genet* 6: 847–859.
- Yao YG, Macaulay V, Kivisild T, Zhang YP, Bandelt HJ (2003) To trust or not to trust an idiosyncratic mitochondrial data set. *Am J Hum Genet* 72: 1341–1346.
- Xia Y, Gu HF, Peng R, Chen Q, Zheng YC, et al. (2012) COI is better than 16S rRNA for DNA barcoding Asiatic salamanders (Amphibia: Caudata: Hynobiidae). *Mol Ecol Resour* 12: 48–56.
- Nicolas V, Schaeffer B, Missouf AD, Kennis J, Colyn M, et al. (2012) Assessment of Three Mitochondrial Genes (*16S*, *Cytb*, *COI*) for Identifying Species in the Praomyini Tribe (Rodentia: Muridae). *PLoS ONE* 7: e36586.
- Cox JPL (2001) Bar coding objects with DNA. *Analyst* 126: 545–547.
- Tautz D, Arctander P, Minelli A, Thomas RH, Vogler AP (2002) DNA points the way ahead in taxonomy. *Nature* 418: 479–479.
- Blaxter M (2003) Molecular systematics: counting angels with DNA. *Nature* 421: 122–124.
- Lipscomb D, Platnick N, Wheeler Q (2003) The intellectual content of taxonomy: a comment on DNA taxonomy. *Trends Ecol Evol* 18: 65–66.
- Pennisi E (2003) Modernizing the Tree of Life. *Science* 300: 1692–1697.
- Stoeckle M (2003) Taxonomy, DNA, and the bar code of life. *Bioscience* 53: 796–797.
- Armstrong KF, Ball SL (2005) DNA barcodes for biosecurity: invasive species identification. *Philos Trans R Soc Lond, B, Biol Sci* 360: 1813–1823.
- Smith M, Poyarkov NA, Hebert PDN (2008) COI DNA barcoding amphibians: take the chance, meet the challenge. *Mol Ecol Notes* 8: 235–246.
- Kerr KCR, Stoeckle MY, Dove CJ, Weigt L, Francis CM, et al. (2007) Comprehensive DNA barcode coverage of North American birds. *Mol Ecol Notes* 7: 535–543.
- Ward RD, Zemlak TS, Innes BH, Last PR, Hebert PDN (2005) DNA barcoding Australia's fish species. *Philos Trans R Soc Lond, B, Biol Sci* 360: 1847–1857.
- Vences M, Thomas M, van der Meijden A, Chiari Y, Vieites DR (2005) Comparative performance of the 16S rRNA gene in DNA barcoding of amphibians. *Front Zool* 2: 1–12.
- Barrett RDH, Hebert PDN (2005) Identifying spiders through DNA barcodes. *Can J Zool* 83: 481–491.
- Kress WJ, Wurdack KJ, Zimmer EA, Weigt LA, Janzen DH (2005) Use of DNA barcodes to identify flowering plants. *Proc Natl Acad Sci USA* 102: 8369.
- Hajibabaei M, Janzen DH, Burns JM, Hallwachs W, Hebert PDN (2006) DNA barcodes distinguish species of tropical Lepidoptera. *Proc Natl Acad Sci USA* 103: 968–971.
- Robba L, Russell SJ, Barker GL, Brodie J (2006) Assessing the use of the mitochondrial *cox1* marker for use in DNA barcoding of red algae (Rhodophyta). *Am J Bot* 93: 1101.
- Min X, Hickey DA (2007) Assessing the effect of varying sequence length on DNA barcoding of fungi. *Mol Ecol Notes* 7: 365–373.
- Seifert KA, Samson RA, deWaard JR, Houbraken J, Levesque CA, et al. (2007) Prospects for fungus identification using COI DNA barcodes, with *Penicillium* as a test case. *Proc Natl Acad Sci USA* 104: 3901.
- Hebert PDN, Penton EH, Burns JM, Janzen DH, Hallwachs W (2004) Ten species in one: DNA barcoding reveals cryptic species in the neotropical skipper butterfly *Astraptes fulgerator*. *Proc Natl Acad Sci USA* 101: 14812–14817.
- Nagy V, Seidl V, Szakacs G, Komoń-Zelazowska M, Kubicek CP, et al. (2007) Application of DNA bar codes for screening of industrially important fungi: the haplotype of *Trichoderma harzianum sensu stricto* indicates superior chitinase formation. *Appl Environ Microbiol* 73: 7048–7058.
- Hebert PDN, Stoeckle MY, Zemlak TS, Francis CM (2004) Identification of birds through DNA barcodes. *PLoS Biol* 2: e312.
- Kimura M (1980) A simple method for estimating evolutionary rates of base substitutions through comparative studies of nucleotide sequences. *J Mol Evol* 16: 111–120.
- Shaffer HB, Meylan P, McKnight ML (1997) Tests of turtle phylogeny: molecular, morphological, and paleontological approaches. *Syst Biol* 46: 235–268.
- Krenz JG, Naylor GJP, Shaffer HB, Janzen FJ (2005) Molecular phylogenetics and evolution of turtles. *Mol Phylogenet Evol* 37: 178–191.
- Spinks PQ, Shaffer HB, Iverson JB, McCord WP (2004) Phylogenetic hypotheses for the turtle family Geomyiidae. *Mol Phylogenet Evol* 32: 164–182.
- Fujita MK, Engstrom TN, Starkey DE, Shaffer HB (2004) Turtle phylogeny: insights from a novel nuclear intron. *Mol Phylogenet Evol* 31: 1031–1040.
- Wink M, Guicking D, Fritz U (2001) Molecular evidence for hybrid origin of *Mauremys iversoni* Pritchard et McCord, 1991, and *Mauremys pritchardi* McCord, 1997 (Reptilia: Testudines: Bataguridae). *Zool Abh Staat Tierk Dresden* 51: 41–49.
- Stuart BL, Parham JF (2007) Recent hybrid origin of three rare Chinese turtles. *Conserv Biol* 8: 169–175.
- Parham JF, Shi H (2001) The discovery of *Mauremys iversoni*-like turtles at a turtle farm in Hainan Province, China: the counterfeit golden coin. *Asiat Herpetol Res* 9: 71–77.
- Stuart BL, Parham JF (2004) Molecular phylogeny of the critically endangered Indochinese box turtle (*Cuora galbinifrons*). *Mol Phylogenet Evol* 31: 164–177.
- Spinks PQ, Bradley Shaffer H, Iverson JB, McCord WP (2004) Phylogenetic hypotheses for the turtle family Geomyiidae. *Mol Phylogenet Evol* 32: 164–182.
- Fritz U, Fattizzo T, Guicking D, Tripepi S, Pennisi MG, et al. (2005) A new cryptic species of pond turtle from southern Italy, the hottest spot in the range of the genus *Emys* (Reptilia, Testudines, Emydidae). *Zool Scr* 34: 351–371.
- Köhler J, Vieites DR, Bonett RM, García FH, Glaw F, et al. (2005) New Amphibians and Global Conservation: A Boost in Species Discoveries in a Highly Endangered Vertebrate Group. *BioScience* 55: 693–696.
- Janzen DH, Hajibabaei M, Burns JM, Hallwachs W, Remigio E, et al. (2005) Wedding biodiversity inventory of a large and complex Lepidoptera fauna with DNA barcoding. *Philos Trans R Soc Lond, B, Biol Sci* 360: 1835–1845.
- Smith MA, Fisher BL, Hebert PDN (2005) DNA barcoding for effective biodiversity assessment of a hyperdiverse arthropod group: the ants of Madagascar. *Philos Trans R Soc Lond, B, Biol Sci* 360: 1825–1834.
- Savolainen V, Cowan RS, Vogler AP, Roderick GK, Lane R (2005) Towards writing the encyclopaedia of life: an introduction to DNA barcoding. *Philos Trans R Soc Lond, B, Biol Sci* 360: 1805–1811.
- Murphy RW, Berry KH, Edwards T, Leviton AE, Lathrop A, et al. (2011) The dazed and confused identity of Agassiz's land tortoise, *Gopherus agassizii* (Testudines, Testudinidae) with the description of a new species, and its consequences for conservation. *ZooKeys*: 39–71.
- Murphy RW, Crawford AJ, Bauer AM, Che J, Donnellan SC, et al. (2013) Cold Code: the global initiative to DNA barcode amphibians and nonavian reptiles. *Mol Ecol Res*. In press.
- Katoh K, Toh H (2010) Parallelization of the MAFFT multiple sequence alignment program. *Bioinformatics* 26: 1899–1900.
- Thompson JD, Gibson TJ, Plewniak F, Jeanmougin F, Higgins DG (1997) The CLUSTAL\_X windows interface: flexible strategies for multiple sequence alignment aided by quality analysis tools. *Nucleic Acids Res* 25: 4876–4882.
- Saitou N, Nei M (1987) The neighbour-joining method: a new method for reconstructing phylogenetic tree. *Mol Biol Evol* 4: 406–425.
- Tamura K, Dudley J, Nei M, Kumar S (2007) MEGA4: molecular evolutionary genetics analysis (MEGA) software version 4.0. *Mol Biol Evol* 24: 1596–1599.
- Xia X, Xie Z (2001) DAMBE: Software Package for Data Analysis in Molecular Biology and Evolution. *J Hered* 92: 371–373.
